# Supplementary material
Source: Springer Nature journal article supplement (https://www.springermedizin.de/resource/supplementary/12936_2012_2502_MOESM1_ESM.pdf/9543128)
Supplement: MOESM1 [file 9543128]

| Day   | Time      | Topic                                                    |
|-------|-----------|----------------------------------------------------------|
| Day 1 | 0830-0900 | Registration                                             |
|       | 0900-0930 | Course Administration, Structure and Expectations        |
|       | 0930-0950 | Break                                                    |
|       | 0950-1020 | Microscope Use and Care                                  |
|       | 1020-1130 | Pre-Course Theory Test and Feedback. Adjust Microscopes. |
|       | 1130-1230 | Lunch                                                    |
|       | 1230-1645 | Pre-Course Practical Test (14 slides) [‘Pre-assessment’] |
| Day 2 | 0815-0915 | Review of Practice Slides                                |
|       | 0915-0935 | Break                                                    |
|       | 0935-1020 | Malaria Overview.                                        |
|       | 1020-1130 | Parasite quantitation (1). Species Revision              |
|       | 1130-1230 | Lunch                                                    |
|       | 1230-1645 | Test Slide Examination (19 slides) <sup>a</sup>          |
| Day 3 | 0815-0915 | Review of Test Slides                                    |
|       | 0915-0935 | Break                                                    |
|       | 0935-1020 | Blood Elements and Artefacts                             |
|       | 1020-1130 | Parasite quantitation (2)                                |
|       | 1130-1230 | Lunch                                                    |
|       | 1230-1645 | Test Slide Examination (18 slides) <sup>a</sup>          |
| Day 4 | 0815-0915 | Review of Test Slides                                    |
|       | 0915-0935 | Break                                                    |
|       | 0935-1020 | QA in Malaria Laboratory Diagnosis                       |
|       | 1020-1130 | Training Tools (incl. Internet)                          |
|       | 1130-1230 | Lunch                                                    |
|       | 1230-1645 | Test Slide Examination (18 slides) <sup>a</sup>          |
| Day 5 | 0830-0915 | Review of Test Slides                                    |
|       | 0915-0935 | Break                                                    |
|       | 0935-1000 | Future Diagnosis and Directions (incl. RDTs)             |
|       | 1000-1130 | Course Evaluation, Certificates and Closing              |
|       | 1130-1230 | Lunch                                                    |

<sup>a</sup> These three examinations make up the 55 ‘post-ECA’ assessment blood films
